# Supplementary material
Source: PubMed Central journal article supplement (PMC7794497)
Supplement: mmc1.pdf [file mmc1.pdf]

## **Supplemental Information**

### **Evaluating the Effects of SARS-CoV-2**

#### **Spike Mutation D614G on**

#### **Transmissibility and Pathogenicity**

**Erik Volz, Verity Hill, John T. McCrone, Anna Price, David Jorgensen, Áine O'Toole, Joel Southgate, Robert Johnson, Ben Jackson, Fabricia F. Nascimento, Sara M. Rey, Samuel M. Nicholls, Rachel M. Colquhoun, Ana da Silva Filipe, James Shepherd, David J. Pascall, Rajiv Shah, Natasha Jesudason, Kathy Li, Ruth Jarrett, Nicole Pacchiarini, Matthew Bull, Lily Geidelberg, Igor Siveroni, COG-UK Consortium, Ian Goodfellow, Nicholas J. Loman, Oliver G. Pybus, David L. Robertson, Emma C. Thomson, Andrew Rambaut, and Thomas R. Connor**

**Table S1** | Posterior values for regression coefficients and standard deviations for the severity analysis of Dataset 2, Related to Figure 3.

| <b>Effect</b>                                                            | <b>Posterior mean</b> | <b>Lower bound of 95% shortest probability interval</b> | <b>Upper bound of 95% shortest probability interval</b> |
|--------------------------------------------------------------------------|-----------------------|---------------------------------------------------------|---------------------------------------------------------|
| Presence of 614G                                                         | 0.03                  | -0.80                                                   | 0.84                                                    |
| Female biological sex                                                    | -0.72                 | -0.95                                                   | -0.50                                                   |
| Threshold 1                                                              | 0.07                  | -0.36                                                   | 0.49                                                    |
| Threshold 2                                                              | 0.92                  | 0.50                                                    | 1.34                                                    |
| Threshold 3                                                              | 1.28                  | 0.85                                                    | 1.71                                                    |
| Cluster random effect standard deviation                                 | 0.26                  | 0.00                                                    | 0.58                                                    |
| Phylogenetic random effect standard deviation                            | 0.62                  | 0.19                                                    | 1.09                                                    |
| Age penalised spline standard deviation                                  | 1.34                  | 0.15                                                    | 2.94                                                    |
| Days since first case in the dataset penalised spline standard deviation | 5.98                  | 2.39                                                    | 10.27                                                   |

**Table S2** | Prior distributions used in the BEAST analysis (see Main text), Related to STAR Methods.

| <b>Parameter</b>                                    | <b>Prior distribution</b> | <b>Shape parameters</b>                                                      |
|-----------------------------------------------------|---------------------------|------------------------------------------------------------------------------|
| Kappa (HKY)                                         | Lognormal                 | Mu = 1.0 Sigma=1.25                                                          |
| Population size (for each lineage)                  | Lognormal                 | Mean = 1.0 Stdev = 1.5                                                       |
| Hyperprior for mean growth and decline rate         | Normal                    | Mean = 0 Stdev = 100                                                         |
| Hyperprior for precision of growth and decline rate | Gamma                     | Shape = 1 Scale = 0.001                                                      |
| Transition time                                     | Normal                    | Mean = 2020.2254 in node height of the individual cluster tree Stdev = 0.034 |

**Table S3 |** Early D614G viruses in lineage B, Related to Figure 1.

| <b>Name</b>          | <b>GISAID ID</b> | <b>Date</b> | <b>Laboratories</b>                                                                                                                                                                                                                                                          | <b>Authors</b>                                                                                                                                 |
|----------------------|------------------|-------------|------------------------------------------------------------------------------------------------------------------------------------------------------------------------------------------------------------------------------------------------------------------------------|------------------------------------------------------------------------------------------------------------------------------------------------|
| Sichuan/SC-PHCC1-022 | EPI_ISL_451345   | 2020-01-24  | West China Hospital of Sichuan University / State Key Laboratory of Biotherapy of Sichuan University                                                                                                                                                                         | Baowen Du, Minjin Wang, Chao Tang, Chuan Chen, Yongzhao Zhou, Mingxia Yu, Hancheng Wei, Weimin Li, Jing-wen Lin, Jia Geng, Binwu Ying, Lu Chen |
| Shanghai/SH0014      | EPI_ISL_416327   | 2020-01-28  | Shanghai Public Health Clinical Center, Shanghai Medical College, Fudan University / National Research Center for Translational Medicine (Shanghai), Ruijin Hospital affiliated to Shanghai Jiao Tong University School of Medicine & Shanghai Public Health Clinical Center | Shengyue Wang, Xiaonan Zhang, Gang Lu, Yun Tan, Yun Ling, Hongzhou Lu, Saijuan Chen                                                            |
| Shanghai/SH0086      | EPI_ISL_416386   | 2020-01-31  | Shanghai Public Health Clinical Center, Shanghai Medical College, Fudan University / National Research Center for Translational Medicine (Shanghai), Ruijin Hospital affiliated to Shanghai Jiao Tong University School of Medicine & Shanghai Public Health Clinical Center | Shengyue Wang, Xiaonan Zhang, Gang Lu, Yun Tan, Yun Ling, Hongzhou Lu, Saijuan Chen                                                            |
| Shanghai/SH0025      | EPI_ISL_416334   | 2020-02-06  | Shanghai Public Health Clinical Center, Shanghai Medical College, Fudan University / National Research Center for Translational Medicine (Shanghai), Ruijin Hospital affiliated to Shanghai Jiao Tong University School of Medicine & Shanghai Public Health Clinical Center | Shengyue Wang, Xiaonan Zhang, Gang Lu, Yun Tan, Yun Ling, Hongzhou Lu, Saijuan Chen                                                            |
| Guangzhou/GZMU0019   | EPI_ISL_429080   | 2020-02-05  | The First Affiliated Hospital of Guangzhou Medical University                                                                                                                                                                                                                | Yanqun Wang, Daxi Wang, Lu Zhang, Wanying Sun, Zhaoyong Zhang et al.                                                                           |
| Guangzhou/GZMU0037   | EPI_ISL_429089   | 2020-02-08  | The First Affiliated Hospital of Guangzhou Medical University                                                                                                                                                                                                                | Yanqun Wang, Daxi Wang, Lu Zhang, Wanying Sun, Zhaoyong Zhang et al.                                                                           |
| Guangzhou/GZMU0020   | EPI_ISL_429081   | 2020-02-05  | The First Affiliated Hospital of Guangzhou Medical University                                                                                                                                                                                                                | Yanqun Wang, Daxi Wang, Lu Zhang, Wanying Sun, Zhaoyong Zhang et al.                                                                           |
| Germany/BavPat1      | EPI_ISL_406862   | 2020-01-28  | Charité Universitätsmedizin Berlin, Institute of Virology; Institut für Mikrobiologie der Bundeswehr, Munich                                                                                                                                                                 | Victor M Corman, Julia Schneider, Talitha Veith, Barbara Mühlemann, Markus Antwerpen, Christian Drosten, Roman Wölfel                          |
